# Supplementary material for: Assessment of the Impact of Temperature on Biofilm Composition with a Laboratory Heat Exchanger Module
Source: MDPI journal article supplement (doi:10.3390/microorganisms9061185), 2021-05-31
Supplement: s1 [file s1]

# Assessment of the Impact of Temperature on Biofilm Composition with a Laboratory Heat Exchanger Module

The technical drawing illustrates the construction of a glass electrode assembly in three views:

- Top View:** Shows a rectangular assembly with a central U-shaped glass tube. The assembly is held together by a Hastaloy plate (1mm thick) and is surrounded by a fluid inlet. Section lines A-A and B-B are indicated.
- A-A (1 : 1.5):** A longitudinal cross-section showing the internal structure. It labels the "Glass 5mm(2x)" and the "Hastaloy plate (1mm)". It also shows the "Fluid in" inlet and the "Fluid out" outlet.
- B-B (1 : 1.5):** An end-sectional view showing the cross-section of the glass tube and the Hastaloy plate. It indicates a gap of "8(space between glass and plate)".

**Figure S1.** Technical drawings of the heat exchanger module showing the top/bottom view (top), the longitudinal cross-section (middle) and the transverse cross-section (bottom).

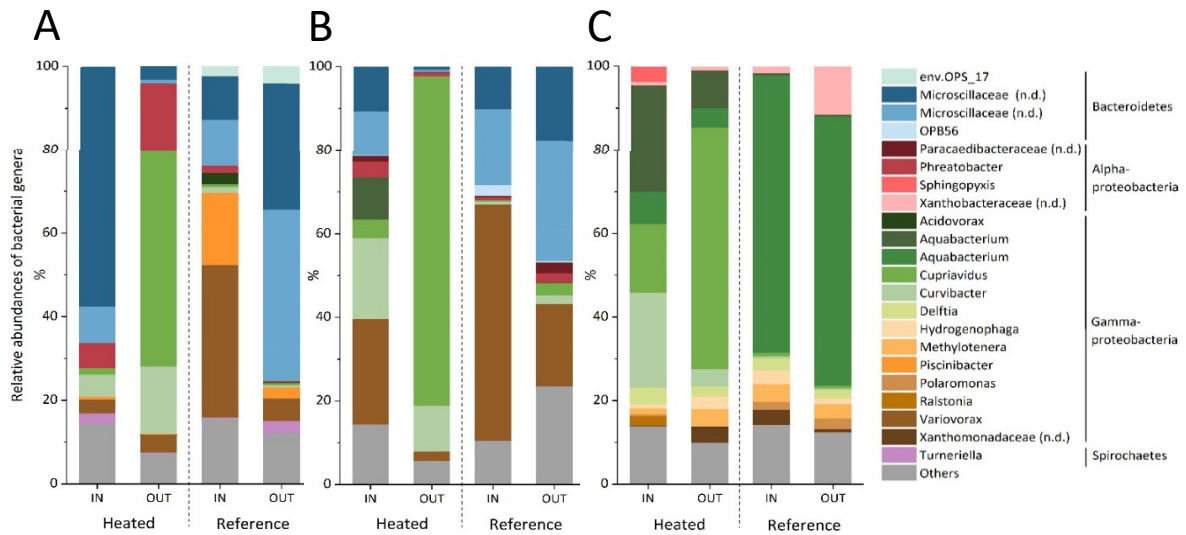

**Figure S2.** Relative abundances of bacterial genera in biofilm samples collected from the reference and heated modules in exp. 1 (A), exp. 2 (B), and exp. 3 (C). Phyla and classes of Proteobacteria are indicated at the right of the legend. Experiments were performed in triplicate.
